# Supplementary material for: Effect of arbuscular mycorrhizal symbiosis on growth and biochemical characteristics of Chinese fir (Cunninghamia lanceolata) seedlings under low phosphorus environment
Source: PeerJ. 2024 Mar 22;12:e17138. doi: 10.7717/peerj.17138 (PMC10962349; doi:10.7717/peerj.17138)
Supplement: Data S1 [file peerj-12-17138-s002.xlsx]

## Sheet: Sheet1
Samples	F	SH(cm)	RCD(mm)	R_MDA(mmol·g-1)	L_MDA(mmol·g-1)	R_SOD（U·g-1）	L_SOD（U·g-1）	R_CAT（U·g-1·min-1）	L_CAT（U·g-1·min-1）	F0	Fm	Fv	Fv/Fm	Fv/Fo	Chl a (mg·g-1)	Chl b (mg·g-1)	Chl a/b	L_IAA(ng·L-1)	R_IAA(ng·L-1)	L_ABA(ug·L-1)	R_ABA(ug·L-1)	L_ZR(ug·L-1)	R_ZR(ug·L-1)
P0-F.m-1	0.74	21.6	2.5	1.25	3.86	358.95	180.26	5.61	3.15	51	284	233	0.82	4.57	5.2	2.51	2.07	566.35	663.63	205.61	394.47	6.89	11
P0-F.m-2	0.91	22.7	2.7	1.31	3.47	327.64	196.54	7.61	3.51	50	261	211	0.81	4.22	5.34	2.64	2.02	587.36	677.19	285.05	393.35	3.35	8.58
P0-F.m-3	0.89	12.5	0.82	1.7	2.13	312.91	206.75	3.66	1.51	45	273	228	0.84	5.07	4.61	2.64	1.75	600.49	626.82	202.12	349.75	3.57	9.94
P0-F.m-4	0.74	16	2.39	1.17	2.07	288.58	216.56	4.25	5.98	32	185	153	0.83	4.78	5.51	2.96	1.86	553.22	562	234.42	350.85	4.07	8.92
P0-F.m-5	0.87	24.3	2.82	0.92	2.95	278.74	198.6	6.07	2.65	69	380	311	0.82	4.51	5.42	3.05	1.78	456.06	578.88	166.32	337.27	3.96	10.82
P0-F.m-6	0.92	16.4	1.77	1.2	3.54	242.29	196.33	7.27	2.5	52	283	231	0.82	4.44	6.14	2.71	2.27	570.29	711.51	138.39	415.57	3.18	9.94
P0-F.m-7	0.89	17.6	0.92	1.63	2.6	296.07	196.11	5.75	3.58	63	347	284	0.82	4.51	6.26	2.66	2.35	347.07	557.77	155.85	413.43	4.84	10.14
P0-R.i-1	0.65	23.3	2.58	1.89	2.48	457.1	236.42	5.37	4.62	46	209	163	0.78	3.54	6.76	3.49	1.94	449.49	620.86	210.85	380.76	5.73	10.57
P0-R.i-2	0.69	29.2	1.46	1.73	2.78	317.38	203.43	5.48	7.71	52	283	231	0.82	4.44	5.04	2.83	1.78	579.48	563.72	161.96	409.31	5.16	7.76
P0-R.i-3	0.75	20.9	1.77	1.69	3.44	389.62	204.79	4.24	1.54	64	295	231	0.78	3.61	4.87	2.78	1.75	372.02	586.09	174.18	400.35	3.57	11.2
P0-R.i-4	0.83	27.1	2.81	0.66	3.53	377.58	203.72	3.98	3.08	60	312	252	0.81	4.2	5.36	2.82	1.9	396.97	707.46	121.8	430.49	4.31	9.1
P0-R.i-5	0.48	31.8	2.21	1.07	2.52	353.18	228.07	4.99	3.4	50	274	224	0.82	4.48	6.93	3.12	2.22	592.61	513.98	235.29	379.98	6.89	10.04
P0-R.i-6	0.77	22.8	1.11	1.32	2.63	382.58	196.25	5.02	6.17	48	252	204	0.81	4.25	7.48	3.22	2.32	395.65	519.8	240.53	379.7	6.08	10.79
P0-R.i-7	0.71	25.3	2.26	0.87	2.32	364.29	152.16	6.07	2.31	57	305	248	0.81	4.35	5.18	2.6	1.99	562.41	682.72	296.4	374.16	5.69	10.95
P0-CK-1	/	19	1.27	1.8	3.07	393.55	180.54	5	3.7	72	281	209	0.74	2.9	7	3.25	2.15	490.2	550.41	291.16	333.91	4.73	10.6
P0-CK-2	/	15.8	1.85	1.21	3.83	336.71	170.35	4.55	3.22	45	181	136	0.75	3.02	7.97	3.31	2.41	379.9	704.37	224.81	381.57	5.88	9.17
P0-CK-3	/	21.2	0.97	0.72	2.86	336.48	190.27	3.42	2.4	62	258	196	0.76	3.16	5.84	2.86	2.04	343.13	666.1	168.07	394.51	6.49	7.88
P0-CK-4	/	9.3	3.29	1.7	3.02	252.75	238.94	5.34	1.61	42	134	92	0.69	2.19	7.08	3.15	2.25	364.14	652.41	211.72	429.25	4.49	9.64
P0-CK-5	/	19.4	1.83	1.8	3.19	324.09	168.98	4.65	5.87	49	155	106	0.68	2.16	7.19	3.12	2.3	402.22	659.31	175.05	337.41	3.44	10
P0-CK-6	/	18.6	2.66	0.64	3.2	414.93	180.56	4.64	2.58	49	192	143	0.74	2.92	4.99	2.43	2.05	529.59	632.02	209.97	338.32	5.45	9.4
P0-CK-7	/	14.4	2.36	1.31	2.91	359.45	135.58	5.29	6.54	58	210	152	0.72	2.62	5.91	2.71	2.18	530.9	497.5	285.92	350.39	3.26	10.49
P1-F.m-1	0.39	17.5	1	1.21	4.77	132.71	265.66	3.17	5.72	35	210	175	0.83	5	4.02	2.49	1.61	467.87	642.73	168.94	369.51	4.68	9.67
P1-F.m-2	0.38	18.5	0.67	1.23	3.41	180.52	223.25	4.84	2.59	48	271	223	0.82	4.65	4.06	2.05	1.98	436.36	724.12	158.47	444.59	5.36	10.38
P1-F.m-3	0.46	18.1	2.15	1.18	3.15	196.45	183.98	4.52	1.55	55	252	197	0.78	3.58	7.6	3.33	2.28	348.38	566.69	121.8	410.44	6.65	10.1
P1-F.m-4	0.81	18.2	2.46	1.63	5.05	228.32	232.31	5.08	3.62	64	319	255	0.8	3.98	6.48	2.91	2.23	596.55	739.24	141.88	400.81	4.97	9.52
P1-F.m-5	0.54	25.1	1.77	0.95	4.45	100.83	273.8	3.91	3.11	30	171	141	0.82	4.7	7.35	3.35	2.19	378.58	629.69	230.92	375.08	5.47	9.39
P1-F.m-6	0.53	15.9	1.57	1.23	2.18	164.58	139.7	7.55	4.67	51	252	201	0.8	3.94	4.27	2.24	1.91	555.85	672.91	234.42	388.47	4.16	9.86
P1-F.m-7	0.49	19.2	1.84	1.18	3.53	172.55	140.49	4.79	4.41	38	206	168	0.82	4.42	5.14	2.53	2.03	357.58	678.69	240.53	396.56	3.7	10.33
P1-R.i-1	0.8	18	1.12	1.6	2.36	481.98	127.46	8.36	4.85	48	210	162	0.77	3.38	6.32	2.98	2.12	419.29	660.42	264.97	382.35	5.03	9.37
P1-R.i-2	0.39	20.4	0.57	1.09	3.32	441.7	175.67	7.17	6.95	60	252	192	0.76	3.2	7.77	3.24	2.4	383.84	532.07	122.68	369.08	4.6	8.8
P1-R.i-3	0.45	19.8	0.74	1.4	2.98	401.42	203.95	9.68	3.94	66	316	250	0.79	3.79	8.88	3.76	2.36	529.59	553.71	192.51	403.07	3.26	9.25
P1-R.i-4	0.66	18.7	1.41	1.81	2.77	388.96	175.94	8.75	2.74	47	212	165	0.78	3.51	10.69	4.14	2.58	558.47	705.96	236.16	382.05	4.25	8.96
P1-R.i-5	0.35	25.4	2.3	1.45	2.5	295.94	189.06	7	6.09	56	239	183	0.77	3.27	6.4	2.96	2.16	354.95	719.92	135.77	418.83	6.34	7.99
P1-R.i-6	0.39	18.1	2.45	1.9	2.42	280.76	169.48	7.95	1.8	50	214	164	0.77	3.28	8.11	3.48	2.33	398.28	656.45	163.71	398.65	7.5	10.33
P1-R.i-7	0.26	18.5	1.98	0.94	1.88	381.37	162.09	4.37	4.47	50	204	154	0.75	3.08	7.11	3.16	2.25	574.23	633.97	292.91	321.88	5.18	9.92
P1-CK-1	/	21.2	3.51	1.09	3.39	195.47	159.31	6.41	4.21	47	228	181	0.79	3.85	7.96	3.53	2.25	516.46	574.41	294.65	367.85	3.09	9.94
P1-CK-2	/	20.1	2.89	1.3	3.19	154.41	150.34	6.58	4.01	27	124	97	0.78	3.59	8.29	3.41	2.43	435.05	607.61	226.56	443.69	5.4	8.89
P1-CK-3	/	8	3.52	0.9	2.9	216	151.71	7.17	6.23	39	146	107	0.73	2.74	8.14	3.47	2.35	364.14	541.61	244.89	401.71	6.84	7.56
P1-CK-4	/	14.2	3.2	1.42	3.65	236.54	153.61	4.84	3.71	57	237	180	0.76	3.16	5.09	2.43	2.09	372.02	599.45	230.05	360.35	5.77	10.08
P1-CK-5	/	23.2	4.03	1.05	3.43	236.54	182.03	5.76	5.9	63	272	209	0.77	3.32	13.22	5.04	2.62	374.64	577.61	158.47	338.06	6.19	7.63
P1-CK-6	/	10.8	2.79	1.29	3.1	205.74	162.69	5.01	4.32	65	215	150	0.7	2.31	8.36	3.54	2.36	492.82	604.2	147.12	324.61	6.91	9.98
P1-CK-7	/	19.1	2.86	1.33	3.59	180.07	147.37	8.32	1.09	66	270	204	0.76	3.09	11.02	4.42	2.49	523.02	495.84	286.79	404.66	4.66	10.32
